# Supplementary material for: The galloyl moiety enhances inhibitory activity of polyphenols against adipogenic differentiation in 3T3-L1 preadipocytes
Source: Royal Society of Chemistry journal article supplement (doi:10.1039/d1fo04179g), 2022-01-01
Supplement: d1fo04179g1.pdf [file d1fo04179g1.pdf]

**Fig. 5**

**PPAR $\gamma$**

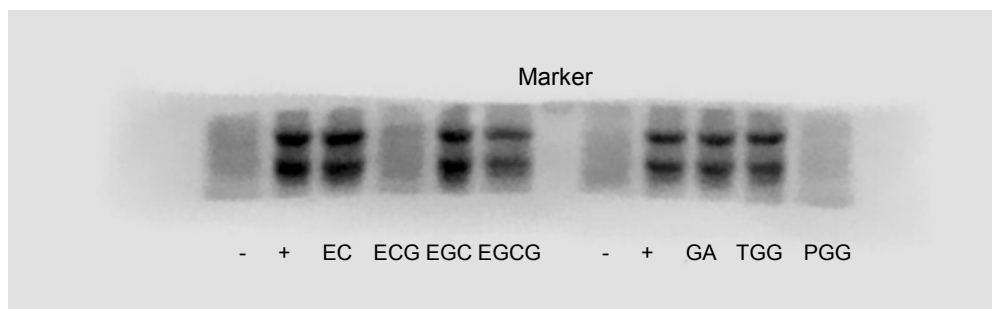

(1)

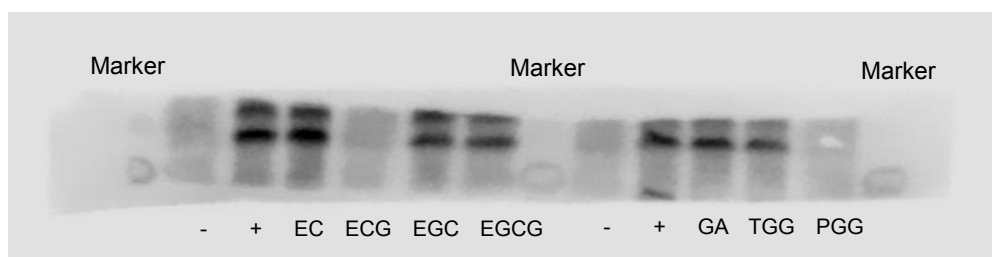

(2)

**C/EBP $\alpha$**

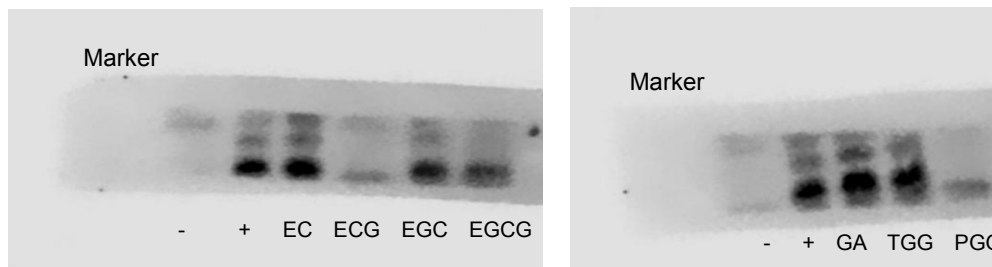

(1)

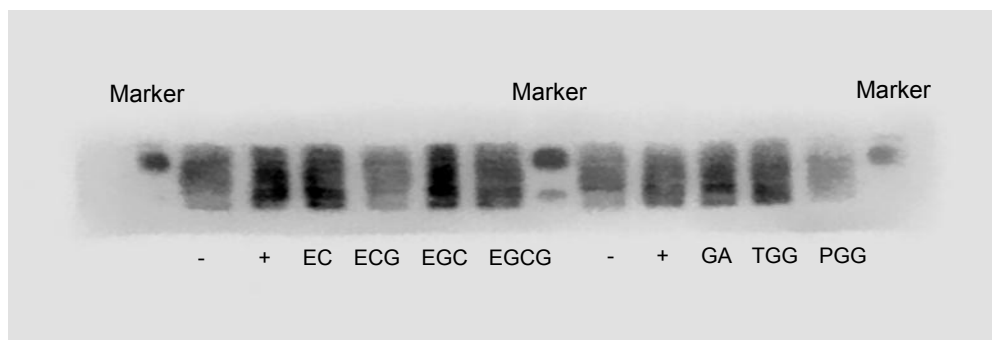

(2)

### SREBP-1c

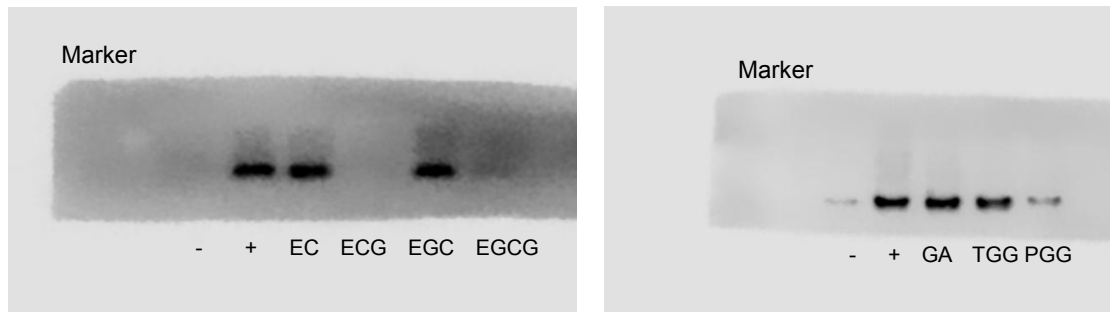

(1)

### $\beta$ -Actin

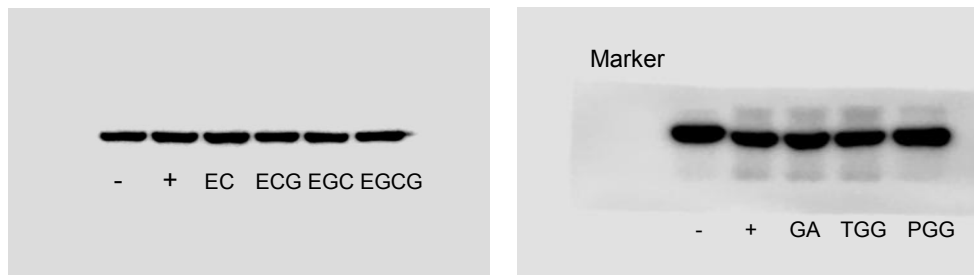

(1)

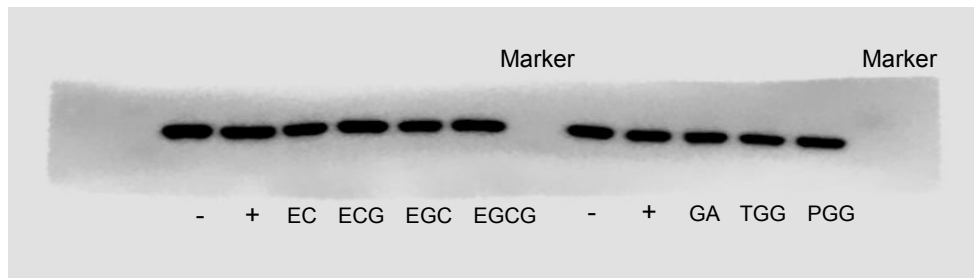

(2)

### Fig. 6

### FAS

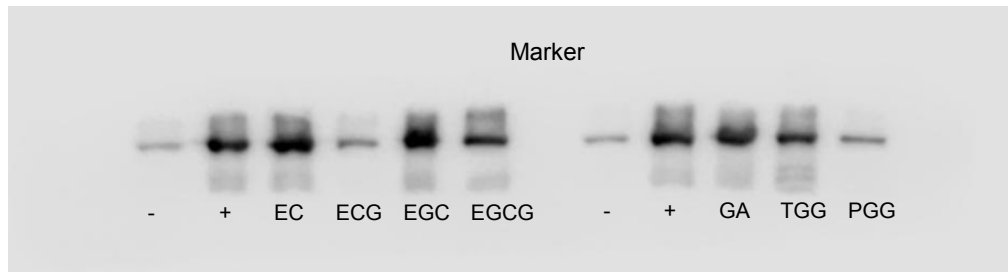

(1)

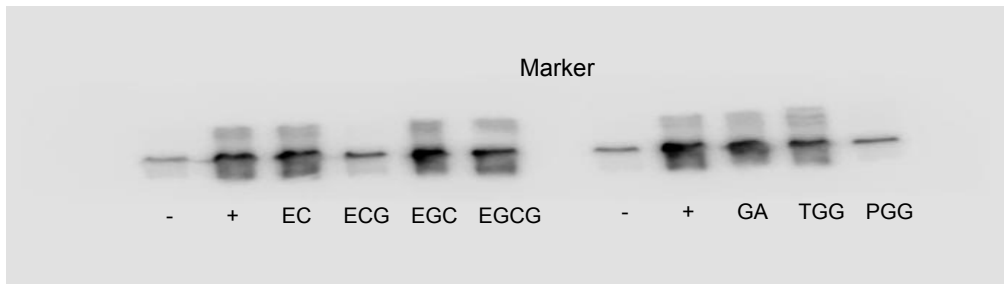

(2)

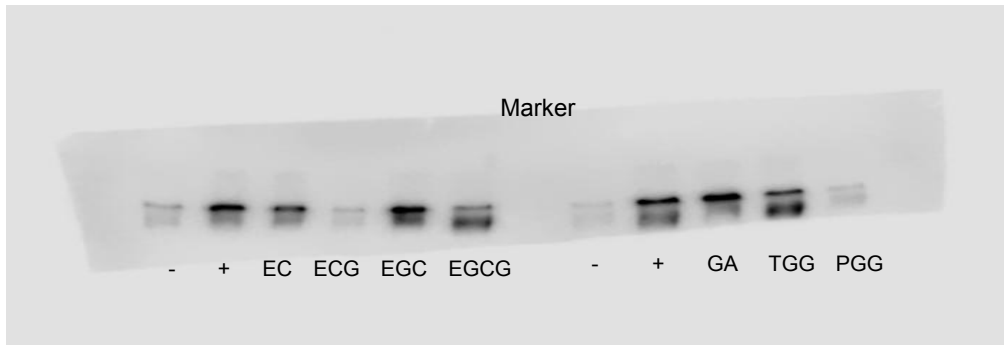

(3)

**ACC**

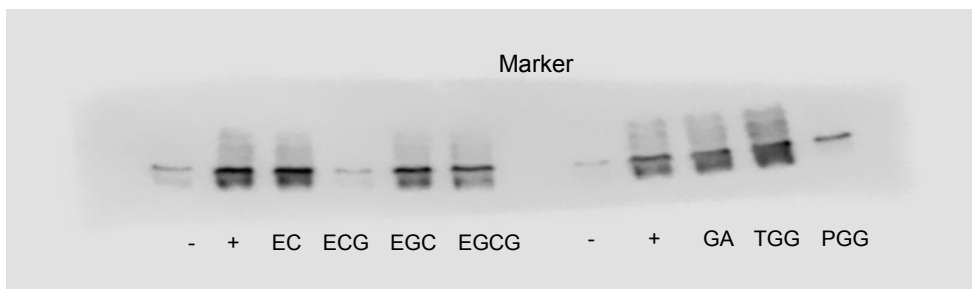

(1)

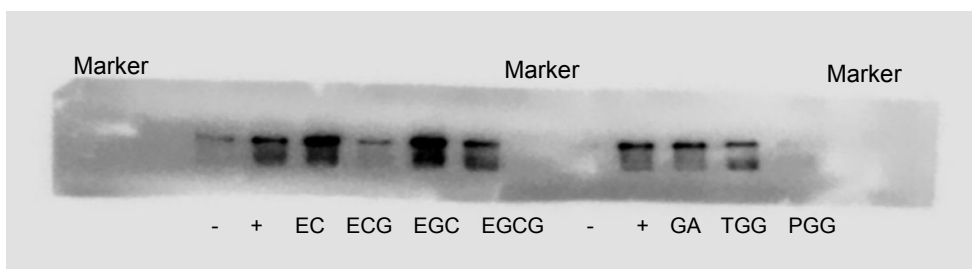

(2)

### SCD-1

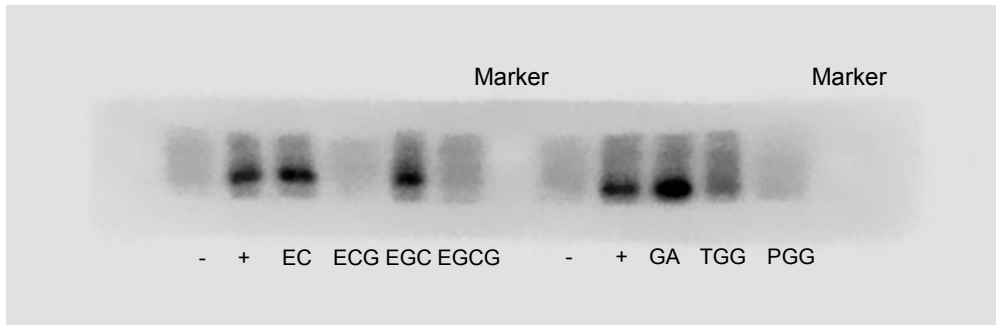

(1)

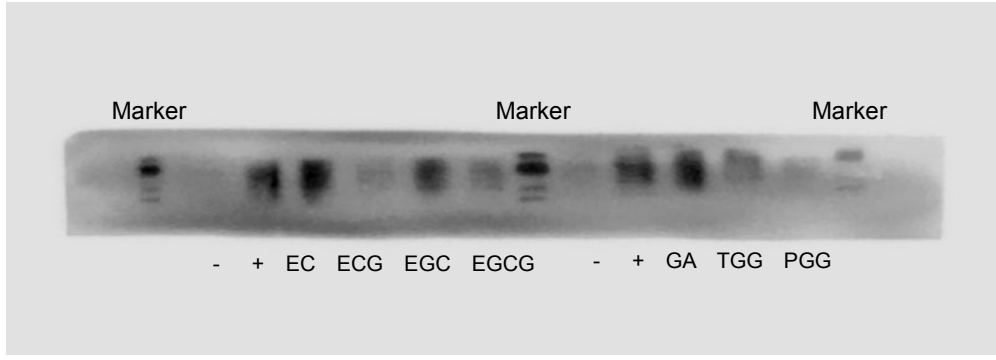

(2)

### FABP-4

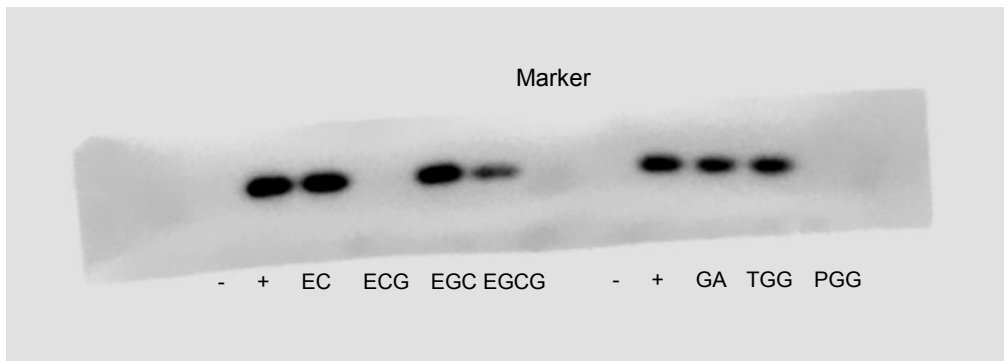

(1)

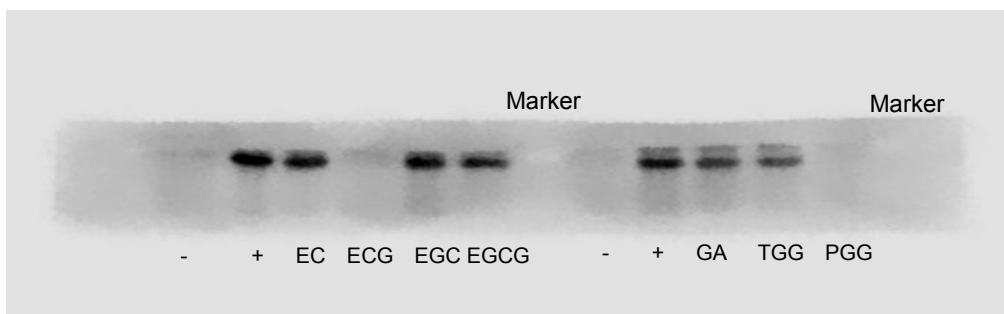

(2)

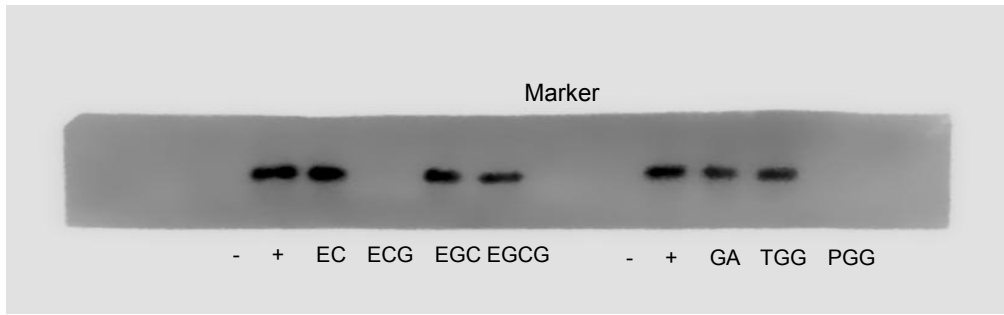

(3)

**$\beta$ -Actin**

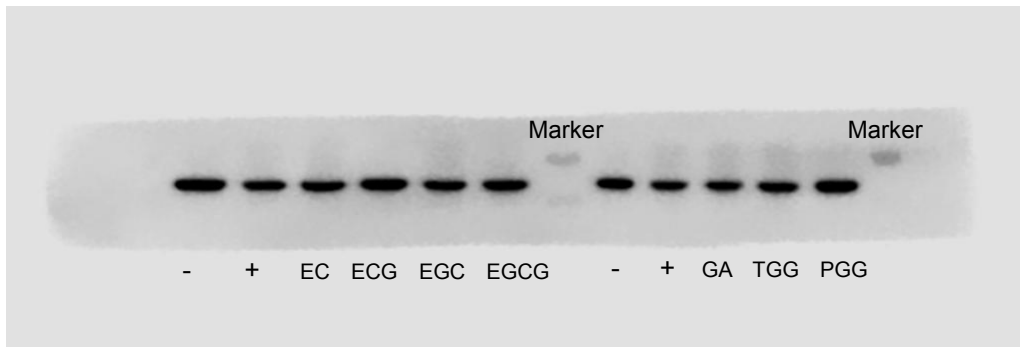

(1)

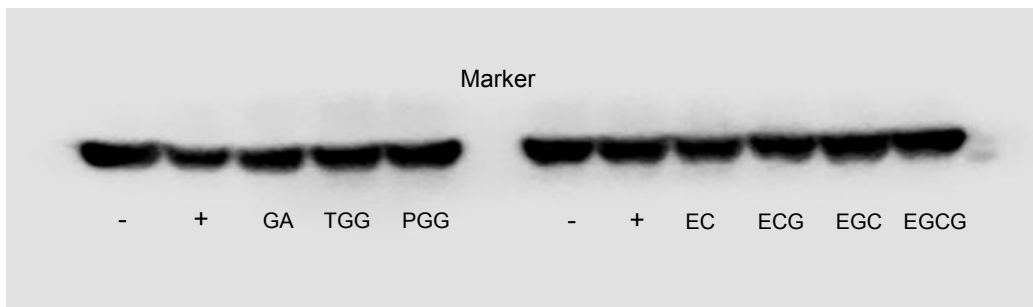

(2)

**Fig. 7**

**P-ERK**

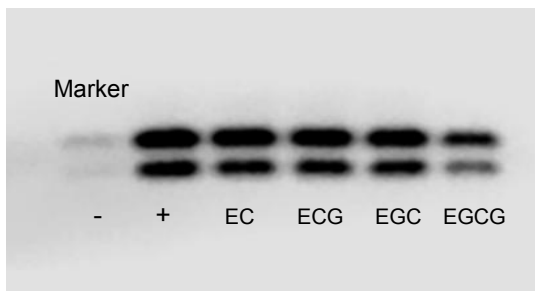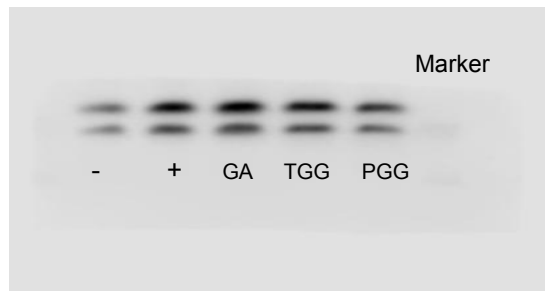

(1)

## ERK

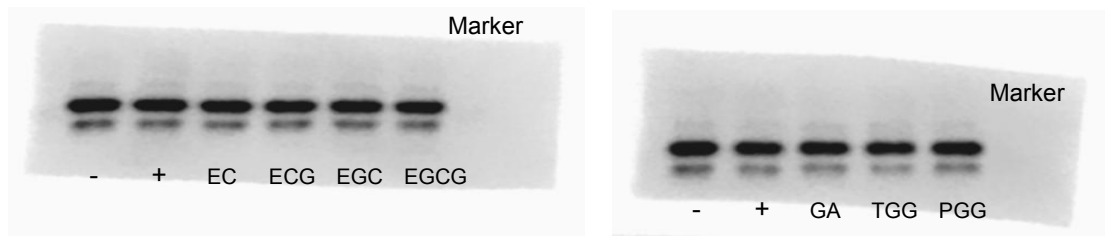

(1)

## P-JNK

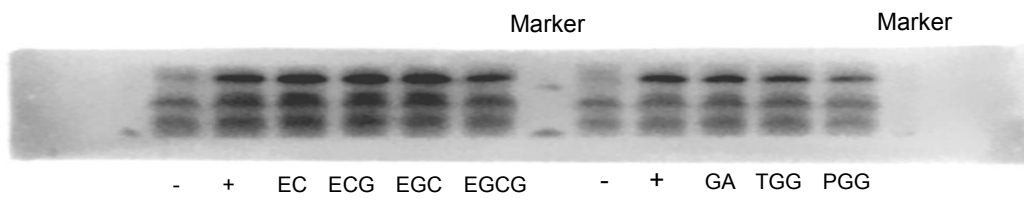

(1)

## JNK

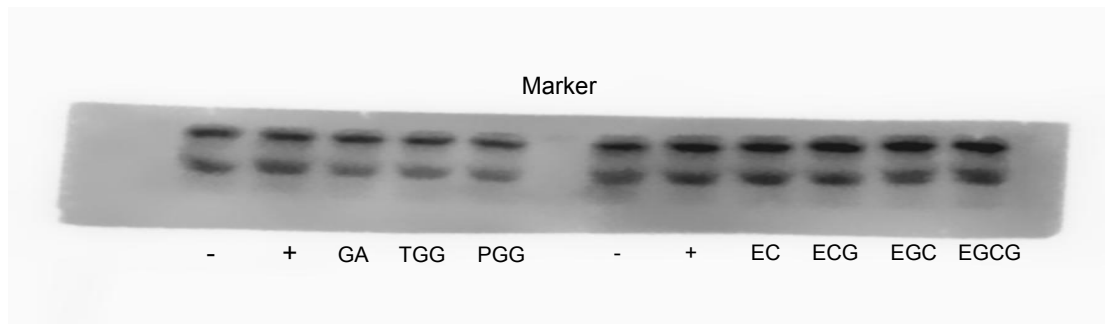

(1)

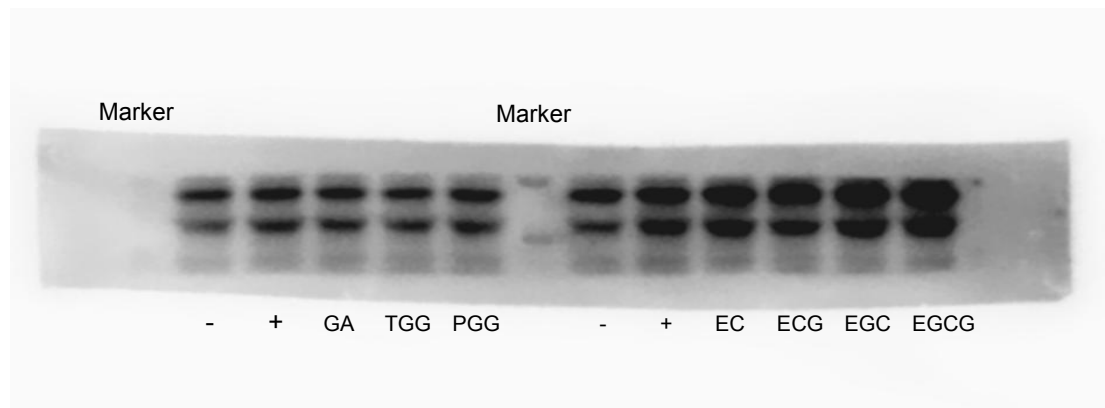

(2)

### P-p-38

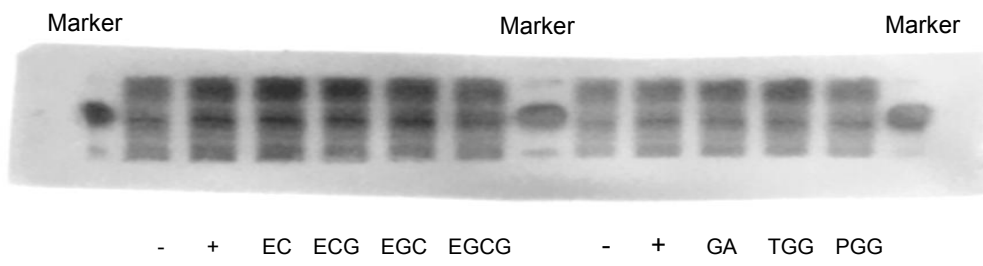

(1)

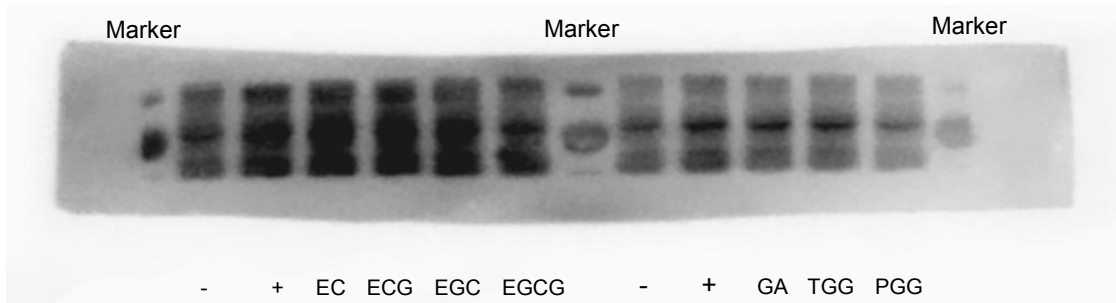

(2)

### p-38

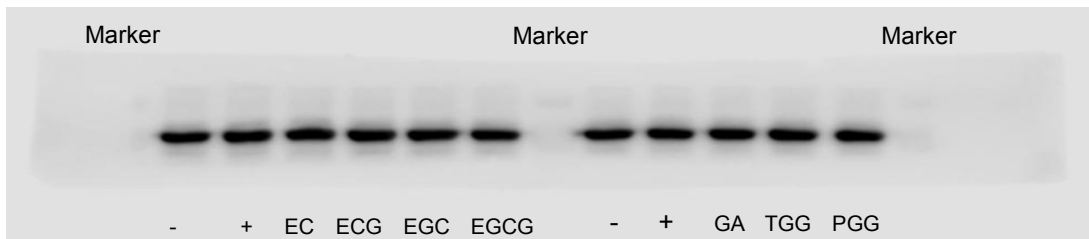

(1)

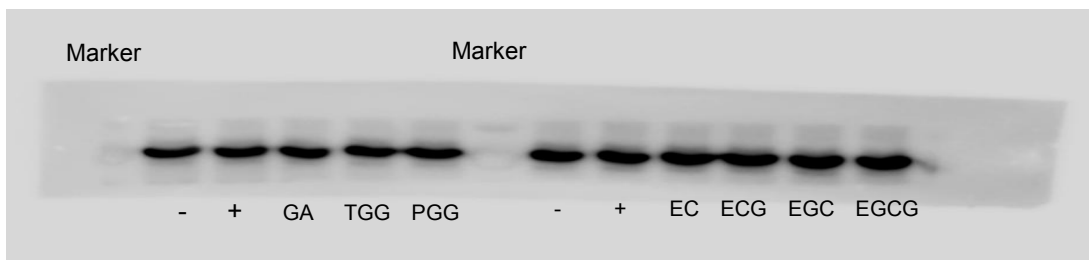

(2)

### $\beta$ -Actin

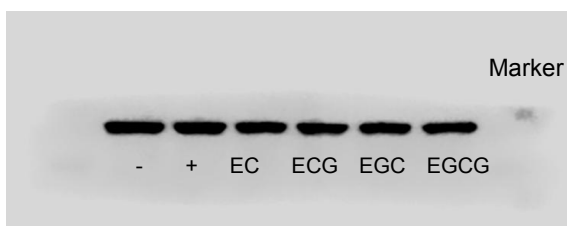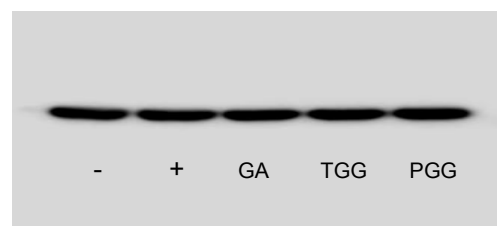

(1)
